# Supplementary material
Source: Research Square preprint supplement (doi:10.21203/rs.3.rs-9483294/v1)

A

Top 20 of GO Enrichment

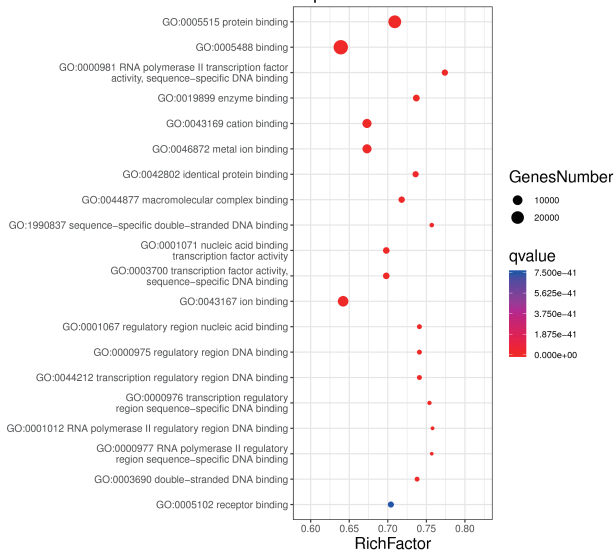

B

Top 20 of GO Enrichment

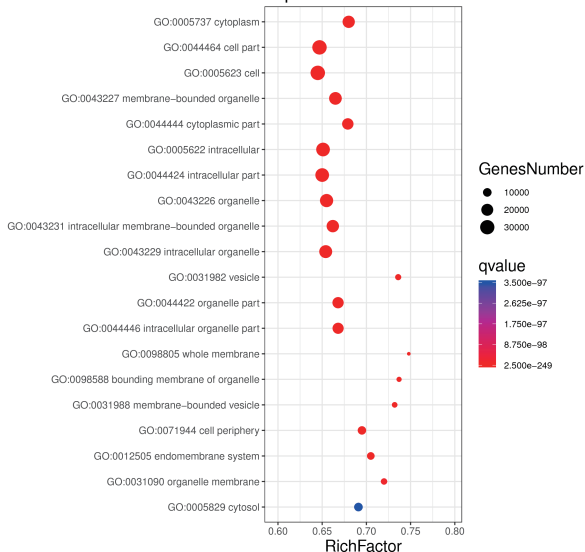

Supplement: Supplementary file 1 [file Figure S1.pdf › supplementary information/Figure S1.pdf]
